# Supplementary material for: Microbe-associated molecular pattern-induced calcium signaling requires the receptor-like cytoplasmic kinases, PBL1 and BIK1
Source: PubMed Central journal article supplement (PMC4279983; doi:10.1186/s12870-014-0374-4), 2014-12-19
Supplement: 12870_2014_374_MOESM1_ESM.pdf [file 12870_2014_374_MOESM1_ESM.pdf]

## Additional file

### Figure S1 – MAPK activation in *cce5* mutants.

Reduced MAPK activation in *cce5-1* mutant is seen with flg22 elicitation at low concentrations (10 nM) (A) but not obvious at higher concentrations (100 nM flg22) (B).

### Figure S2 – MAMP-induced reactive oxygen species (ROS) accumulation.

Reduced ROS accumulation in the *cce5* mutants after elf18 (A) or flg22 (B) treatments.

### Figure S3 – Evolutionary relationships of 51 “group VII” RLCKs.

The 51 RLCK sequences were based on a classification of “group VII” RLCKs (<http://bioinfo.bti.cornell.edu/cgi-bin/itak/index.cgi>), with the relevant RLCKs mentioned in this article highlighted in grey. The evolutionary history was inferred using the Neighbor-Joining method [1]. The optimal tree with the sum of branch length = 10.29429802 is shown. The percentage of replicate trees in which the associated taxa clustered together in the bootstrap test (1000 replicates) are shown next to the branches [2]. The tree is drawn to scale, with branch lengths in the same units as those of the evolutionary distances used to infer the phylogenetic tree. The evolutionary distances were computed using the Poisson correction method [3] and are in the units of the number of amino acid substitutions per site. All positions containing gaps and missing data were eliminated from the dataset (Complete deletion option). There were a total of 247 positions in the final dataset. Phylogenetic analyses were conducted in MEGA4 [4].

**Table S1** – Mutant lines used in this study.

**Table S2** – CAPS markers for genotyping the *cce5* mutant alleles.

**Table S3** – Primers used for molecular cloning.

## Additional References

1. Saitou N, Nei M: **The Neighbor-Joining Method - a new method for reconstructing phylogenetic trees.** *Molecular Biology and Evolution* 1987, **4**(4):406-425.
2. Felsenstein J: **Confidence-Limits on Phylogenies - an approach using the bootstrap.** *Evolution* 1985, **39**(4):783-791.
3. Zuckerkandl E, Pauling L: **Molecules as documents of evolutionary history.** *J Theor Biol* 1965, **8**(2):357-&.
4. Tamura K, Dudley J, Nei M, Kumar S: **MEGA4: Molecular evolutionary genetics analysis (MEGA) software version 4.0.** *Molecular Biology and Evolution* 2007, **24**(8):1596-1599.

Ranf et al. Figure S1

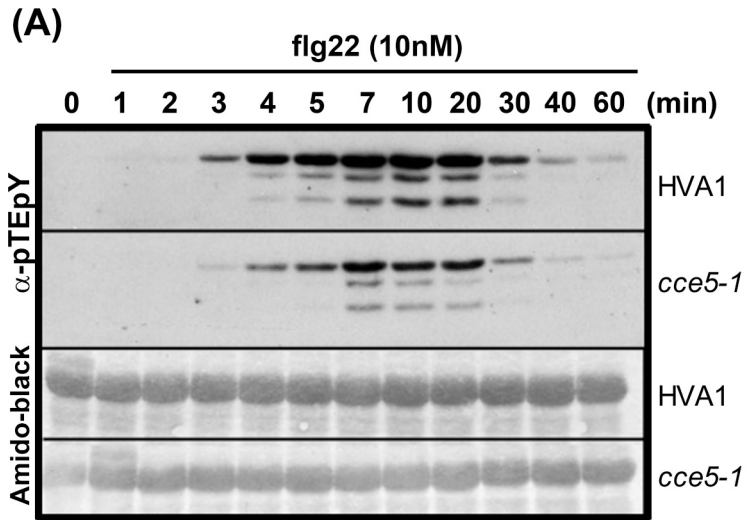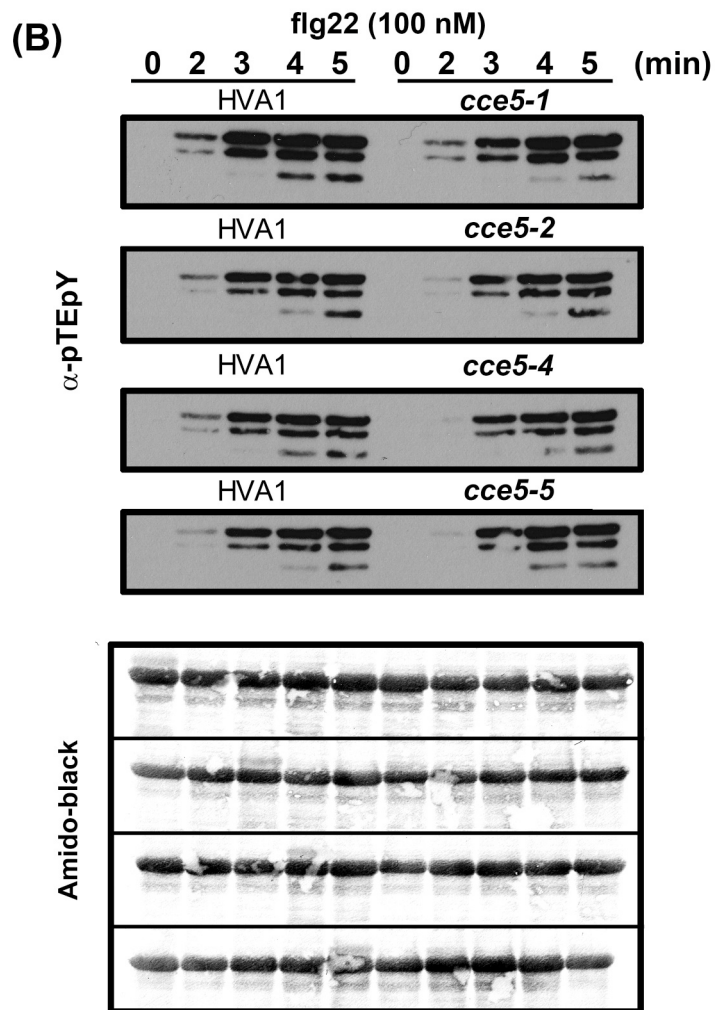

Ranf et al. Figure S2

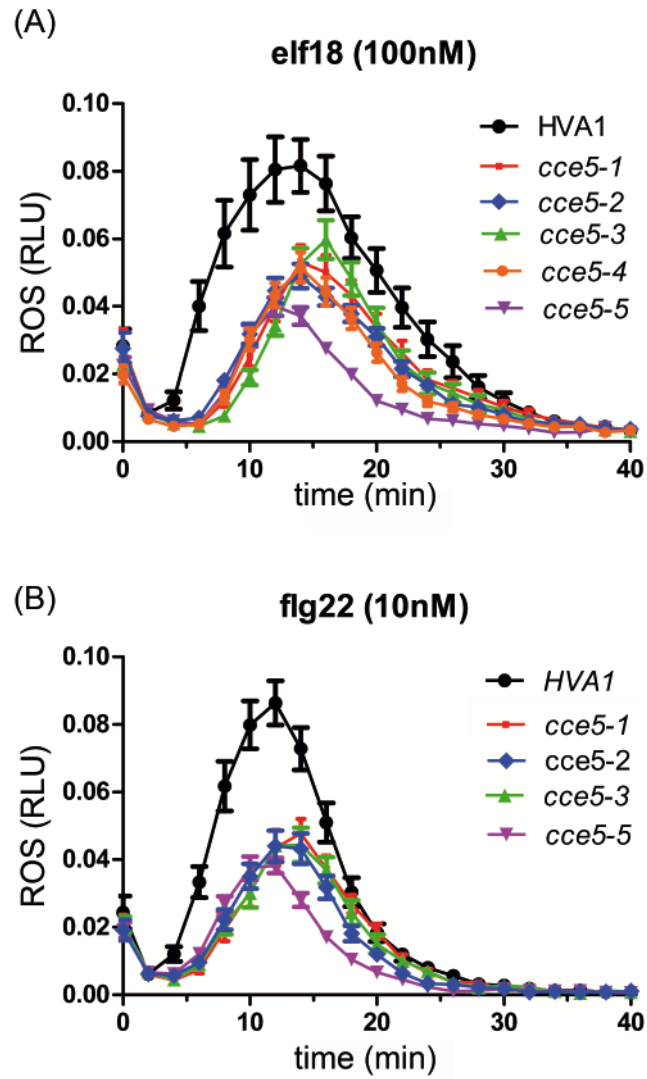

Ranf et al. Figure S3

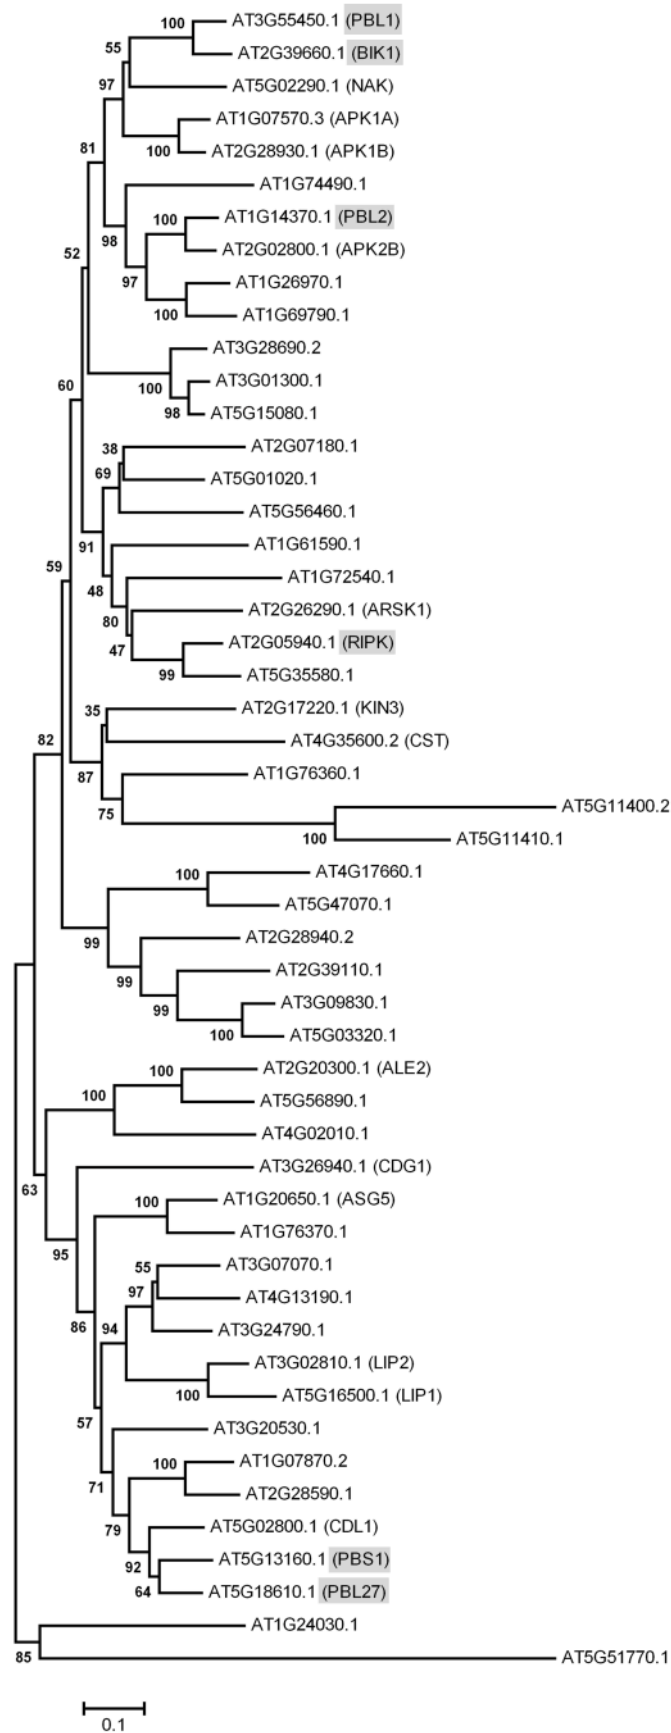

**Table S1. Mutant lines used in this study**

Mutant lines used are listed below showing the AGI code, identity of insertion line, primers used for genotyping, the aequorin transgenic lines used for crossing and the references (source of the mutants).

| mutant                           | AGI code  | insertion line | genotyping primers                                           | aeq. lines            | reference                       | obtained from |
|----------------------------------|-----------|----------------|--------------------------------------------------------------|-----------------------|---------------------------------|---------------|
| <b><i>bak1-4</i></b>             | At4g33430 | SALK_116202    | RP: CCGGAGATATTCCTGTTAATGG<br>LP: ACAAGCAATCTTTCGGTTGG       | -                     | Chinchilla <i>et al.</i> , 2007 | B. Kemmerling |
| <b><i>bik1</i></b>               | At2g39660 | SALK_005291    | RP: GGGTATGGGACATGTAACCGGAAA<br>LP: CAGGTCACTTGAATGCAAGAAGCG | x pMAQ2               | Veronese <i>et al.</i> , 2006   | T. Mengiste   |
| <b><i>pbl1-1</i></b>             | At3g55450 | SAIL_1236_D07  | RP: AAGATGTTTGACGCCTTGATG<br>LP: TCCACCCAAAAACAGCATAAG       | x pMAQ2<br>x pUBQ-AEQ | Zhang <i>et al.</i> , 2010      | NASC          |
| <b><i>pbl2-1</i></b><br>(C12.1)* | AT1G14370 | SALK_149140    | RP: GGGTCCTTCAGGACTAAGCAC<br>LP: ACCTGTGGCAACATATTCAGG       | x pUBQ-AEQ            | Zhang <i>et al.</i> , 2010      | NASC          |
| <b><i>pbl2-2</i></b><br>(C10.5)* | AT1G14370 | GABI_835G07    | RP: AAGAAGGTAAGGCGATGCAC<br>LP: TGGGCAATAAGGATGAAAGTG        | x pUBQ-AEQ            | -                               | NASC          |
| <b><i>pbs1-2</i></b><br>(C3.2)*  | AT5G13160 | SALK_062464    | RP: TATGTACAACCGGAAGATGGC<br>LP: TCCTCTGGTTAAGCTAACGGG       | x pUBQ-AEQ            | Warren <i>et al.</i> , 1999     | NASC          |
| <b><i>serk4-1</i></b>            | At2g13790 | SALK_057955    | RP: ACGCTCAAGTGGAGTAATGA<br>LP: GCAGCTGAAGAAGACCCAGA         | -                     | Albrecht <i>et al.</i> , 2008   | S. De Vries   |
| <b><i>serk5-1</i></b>            | At2g13800 | SALK_147275    | RP: CTGAAGAAGACCCAGAGG<br>LP: TTGCTTAATGGAAGTGGAGAGA         | -                     | Albrecht <i>et al.</i> , 2008   | S. De Vries   |
|                                  |           |                | SALK_LBb1.3: ATTTTGCCGATTCGGAAC                              |                       |                                 |               |
|                                  |           |                | SAIL_LB1: GCCTTTTCAGAAATGGATAAATAGCCTTGCTTCC                 |                       |                                 |               |
|                                  |           |                | GABI_o8409: ATATTGACCATCATACTCATTGC                          |                       |                                 |               |

\*Internal codes for our laboratory collection.

**Table S2. CAPS markers for genotyping the *cce5* mutant alleles**

| <i>cce5</i> mutant | original name* | SNP    | amino acid exchange | CAPS marker:<br>PCR primers                               | CAPS marker:<br>restriction enzyme<br>(Temp./source) | CAPS marker:<br>fragment sizes for<br>wild type (WT) and mutant (M) |
|--------------------|----------------|--------|---------------------|-----------------------------------------------------------|------------------------------------------------------|---------------------------------------------------------------------|
| <i>cce5-1</i>      | 5E3            | G465A  | G70D                | P1: TCAAATCCGTGATCTTTTGG<br>P2: TCAGGGTTAAGTCGTTAACAGC    | BclI<br>(37°C, NEB)                                  | WT: 438 bp<br>M: 329 + 109 bp                                       |
| <i>cce5-2</i>      | 21L8           | C546T  | R110-               | P1: TCAAATCCGTGATCTTTTGG<br>P2: CATGGACGAGATCAAAGACTCA    | TscAI<br>(65°C, Thermo Scientific)                   | WT: 717 bp<br>M: 458 + 259 bp                                       |
| <i>cce5-3</i>      | 63L12          | C584T  | A97V                | P1: AAGGGTCATGGGTACTTTTGG<br>P2: GCCTGCTTGTGAGGTATGGT     | BbvI<br>(37°C, NEB)                                  | WT: 182 + 38 bp<br>M: 214 bp                                        |
| <i>cce5-4</i>      | 69N19          | G941A  | Q272-               | P1: CAGAGATTAAGTATTTGGGGCAGT<br>P2: GCATTTAAGTGGCCTGAAAAA | Cac8I<br>(37°C, NEB)                                 | WT: 307 + 71 bp<br>M: 381 bp                                        |
| <i>cce5-5</i>      | 71C11          | C1506T | R172Q               | P1: CAGCTCATAAGACAGAAGGAGAAA<br>P2: CCATCAGGGTTAAGT       | Sfcl<br>(37°C, Thermo Scientific)                    | WT: 762 bp<br>M: 513 + 249 bp                                       |

\*Internal codes for our laboratory collection.

**Table S3. Primers used for molecular cloning**

| primer name   | primer sequence                         | purpose                                                                       |
|---------------|-----------------------------------------|-------------------------------------------------------------------------------|
| PBL1_F        | CGGTTGCCTCTACCATCTCA                    | PCR amplification of genomic fragment from <i>cce5</i> alleles for sequencing |
| PBL1_R        | CAAATCGAATATTTTCAGGAGCA                 | PCR amplification of genomic fragment from <i>cce5</i> alleles for sequencing |
| PBL1_F1       | TTCTTCAGTGTTTACTTTTTCTCTTTC             | sequencing                                                                    |
| PBL1_F2       | GTGGCTTTGGTTGTGTCTTT                    | sequencing                                                                    |
| PBL1_F3       | TTAGCGAGAGACGGTCCAAT                    | sequencing                                                                    |
| PBL1_R1       | TCTCGGTGACCTTGAAAACC                    | sequencing                                                                    |
| PBL1-PromF2   | TGAAAAATGTCCAACATTACGAA                 | sequencing                                                                    |
| PBL1-PromF3   | AACTTATGTCCCATCCCATGA                   | sequencing                                                                    |
| PBL1-Prom     | caccGTCCTTTGCTTTTCCAGTCGC               | cloning in pENTR-D-TOPO                                                       |
| PBL1-START    | caccATGGGTTCTTGCTCAGTTCTCG              | cloning in pENTR-D-TOPO                                                       |
| PBL1-STARTmut | caccATGGcTTCTTGCTCAGTTCTCG              | cloning in pENTR-D-TOPO                                                       |
| PBL1-STOP     | CTACAATCCAACGGTTTTTTTGTAAACCG           | cloning in pENTR-D-TOPO                                                       |
| PBL1-NoSTOP   | CAATCCAACGGTTTTTTTGTAAACCG              | cloning in pENTR-D-TOPO                                                       |
| PBL1-NMSmut-F | CTTCATCATTCTACTAAATGGCTTCTTGCTCAGTTCTCG | site-directed mutagenesis of NMS                                              |

|               |                                          |                                    |
|---------------|------------------------------------------|------------------------------------|
| PBL1-NMSmut-R | CGAGAACTGAGACAAGAAGCCATTTAGTAGAATGATGAAG | site-directed mutagenesis of NMS   |
| BIK1-START    | caccATGGGTTCTTGCTTCAGTTCTC               | cloning in pENTR-D-TOPO            |
| BIK1-STARTmut | caccATGGCTTCTTGCTTCAGTTCTC               | cloning in pENTR-D-TOPO            |
| BIK1-STOP     | CTACACAAGGTGCCTGCCAAAAG                  | cloning in pENTR-D-TOPO            |
| BIK1-NoSTOP   | CACAAGGTGCCTGCCAAAAG                     | cloning in pENTR-D-TOPO            |
| AEQ-START     | caccATGACCAGCGAACAATATTC                 | cloning of AEQ-ORF in pENTR-D-TOPO |
| AEQ-STOP      | TTAGGGGACAGCTCCACCGTA                    | cloning of AEQ-ORF in pENTR-D-TOPO |
